# Supplementary material for: Metformin versus Insulin for the Treatment of Gestational Diabetes
Source: Atypon-hosted journal article supplement (doi:10.1056/nejmoa0707193), 2008-05-07
Supplement: nejm_rowan_2003sa1.pdf [file nejm_rowan_2003sa1.pdf]

## Supplementary Appendix

This appendix has been provided by the authors to give readers additional information about their work.

Supplement to: Rowan JA, Hague WM, Gao W, et al. Metformin versus insulin for the treatment of gestational diabetes. *N Engl J Med* 2008;358:2003-15.

Table: Baseline maternal characteristics and primary outcome in women treated with metformin alone compared with women requiring supplemental insulin

|                                              | Metformin alone<br>N=195 | Supplemental insulin<br>N=168 | P<br>value |
|----------------------------------------------|--------------------------|-------------------------------|------------|
| <b>Baseline maternal characteristics</b>     |                          |                               |            |
| BMI (kg/m <sup>2</sup> )                     |                          |                               |            |
| Early pregnancy *                            | 31.1 ± 7.8               | 33.6 ± 8.6                    | 0.01       |
| At enrollment                                | 33.7 ± 7.1               | 36.7 ± 9.3                    | <0.001     |
| Race or ethnic group – no (%)                |                          |                               |            |
| European/Caucasian                           | 102 (52.3)               | 73 (43.4)                     | 0.09       |
| Polynesian (Pacific Islander, Maori)         | 23 (11.8)                | 50 (29.8)                     | <0.001     |
| Indian                                       | 23 (11.8)                | 15 (8.9)                      | 0.37       |
| Chinese/other SE Asian                       | 33 (16.9)                | 16 (9.5)                      | 0.04       |
| Other/mixed                                  | 14 (7.2)                 | 14 (8.3)                      | 0.68       |
| Nulliparous – no (%)                         | 75 (38.5)                | 40 (23.8)                     | 0.003      |
| Past Obstetric history – no (%) †            |                          |                               |            |
| Gestational diabetes mellitus                | 38 (19.5)                | 56 (33.3)                     | 0.009      |
| ≥3 terminations or miscarriages              | 27 (13.8)                | 57 (33.9)                     | <0.001     |
| Maternal family history of diabetes – no (%) | 74 (38.0)                | 88 (52.4)                     | 0.006      |
| 75 g OGTT: fasting glucose (mg/dl) ‡         | 95.4 ± 14.4              | 109.8 ± 19.8                  | <0.001     |
| Enrollment fasting glucose (mg/dl) §         | 90.0 ± 10.8              | 104.4 ± 19.8                  | <0.001     |
| Enrollment HbA1c (%)                         | 5.6 ± 0.6                | 5.9 ± 0.7                     | <0.001     |
| <b>Primary outcome composite – no (%)</b>    | 58 (29.7)                | 58 (34.5)                     | 0.33       |
| Recurrent glucose level <46.8 mg/dl          | 28 (14.4)                | 27 (16.1)                     | 0.65       |
| Respiratory distress                         | 7 (3.4)                  | 5 (3.0)                       | 0.74       |
| Phototherapy                                 | 15 (7.7)                 | 14 (8.3)                      | 0.82       |
| Birth trauma                                 | 10 (5.1)                 | 6 (3.6)                       | 0.47       |
| Apgar <7 at 5 min                            | 2 (1.0)                  | 1 (0.6)                       | 1.0        |
| Prematurity <37 weeks                        | 24 (12.3)                | 20 (11.9)                     | 0.91       |

\* Early pregnancy BMI is based on 158 in metformin alone group and 123 in supplemental insulin group

† There were 147 previous pregnancies in metformin alone group and 139 in supplemental insulin group

‡ To convert values for glucose to mmol/l divide by 18. Fasting OGTT results are based on 173 in metformin alone group and 148 in supplemental insulin group

§ Enrollment fasting glucose based on 174 in metformin alone group and 150 in supplemental insulin group

|| Enrollment HbA1c based on 185 in metformin alone group and 160 in supplemental insulin group
